# Supplementary material for: A New Enterobacter cloacae Bacteriophage EC151 Encodes the Deazaguanine DNA Modification Pathway and Represents a New Genus within the Siphoviridae Family
Source: MDPI journal article supplement (doi:10.3390/v13071372), 2021-07-15
Supplement: s1 [file s1]

**Table S2. Calculated digestion patterns of EC151 DNA for type II restriction endonucleases**

|                                        | Acc65I<br>(G <sup>^</sup> GTACC)                               | ApaI<br>(GGGCC <sup>^</sup> C<br>) | DraI<br>(TTT <sup>^</sup> AAA)                                                                                                                                                                                                           | KpnI<br>(GGTAC <sup>^</sup> C)                                 | Sall<br>(G <sup>^</sup> TCGAC)                                                       | XmaI<br>(C <sup>^</sup> CCGGG) |
|----------------------------------------|----------------------------------------------------------------|------------------------------------|------------------------------------------------------------------------------------------------------------------------------------------------------------------------------------------------------------------------------------------|----------------------------------------------------------------|--------------------------------------------------------------------------------------|--------------------------------|
| Calculated size of DNA fragments (b.p) | 18744<br>13000<br>10526<br>5458<br>5283<br>3953<br>3454<br>336 | 29330<br>21664<br>9760             | 9428<br>7239<br>7190<br>4543<br>2975<br>2649<br>2218<br>2127<br>2090<br>1939<br>1600<br>1596<br>1528<br>1363<br>1360<br>1339<br>1303<br>1238<br>1203<br>1181<br>1100<br>1012<br>549<br>540<br>422<br>320<br>237<br>229<br>190<br>40<br>6 | 18744<br>13000<br>10526<br>5458<br>5283<br>3953<br>3454<br>336 | 18644<br>13525<br>13133<br>7532<br>2425<br>1523<br>1518<br>1101<br>756<br>389<br>208 | 31431<br>23753<br>5570         |
