# Supplementary material for: A New Enterobacter cloacae Bacteriophage EC151 Encodes the Deazaguanine DNA Modification Pathway and Represents a New Genus within the Siphoviridae Family
Source: MDPI journal article supplement (doi:10.3390/v13071372), 2021-07-15
Supplement: s1 [file s1]

| <b>№</b> | <b>Species</b>                     | <b>CEMTC* Strain Number</b> | <b>Isolation source</b> |
|----------|------------------------------------|-----------------------------|-------------------------|
| 1        | <i>Enterobacter asburiae</i>       | CEMTC 1100                  | natural                 |
| 2        | <i>Enterobacter asburiae</i>       | CEMTC 1123                  | natural                 |
| 3        | <i>Enterobacter asburiae</i>       | CEMTC 1229                  | natural                 |
| 4        | <i>Enterobacter asburiae</i>       | CEMTC 1622                  | clinical                |
| 5        | <i>Enterobacter asburiae</i>       | CEMTC 1687                  | clinical                |
| 6        | <i>Enterobacter cancerogenus</i>   | CEMTC 3998                  | insect                  |
| 7        | <i>Enterobacter cancerogenus</i>   | CEMTC 4000                  | insect                  |
| 8        | <i>Enterobacter cancerogenus</i>   | CEMTC 4006                  | insect                  |
| 9        | <i>Enterobacter cloacae</i>        | CEMTC 281                   | clinical                |
| 10       | <i>Enterobacter cloacae</i>        | CEMTC 1436                  | veterinary              |
| 11       | <i>Enterobacter cloacae</i>        | CEMTC 1763                  | clinical                |
| 12       | <i>Enterobacter cloacae</i>        | CEMTC 2064                  | clinical                |
| 13       | <i>Enterobacter cloacea</i>        | CEMTC 2083                  | clinical                |
| 14       | <i>Enterobacter cloacae</i>        | CEMTC 2668                  | clinical                |
| 15       | <i>Enterobacter cloacae</i>        | CEMTC 3874                  | clinical                |
| 16       | <i>Enterobacter cloacae</i>        | CEMTC 3929                  | clinical                |
| 17       | <i>Enterobacter cowanii</i>        | CEMTC 1799                  | clinical                |
| 18       | <i>Enterobacter cowanii</i>        | CEMTC 2520                  | clinical                |
| 19       | <i>Enterobacter cowanii</i>        | CEMTC 2691                  | clinical                |
| 20       | <i>Enterobacter cowanii</i>        | CEMTC 2692                  | clinical                |
| 21       | <i>Enterobacter hormaechei</i>     | CEMTC 279                   | clinical                |
| 22       | <i>Enterobacter hormaechei</i>     | CEMTC 1643                  | clinical                |
| 23       | <i>Enterobacter hormaechei</i>     | CEMTC 1719                  | clinical                |
| 24       | <i>Enterobacter hormaechei</i>     | CEMTC 2316                  | clinical                |
| 25       | <i>Enterobacter hormaechei</i>     | CEMTC 2387                  | natural                 |
| 26       | <i>Enterobacter hormaechei</i>     | CEMTC 2800                  | insect                  |
| 27       | <i>Enterobacter hormaechei</i>     | CEMTC 2801                  | insect                  |
| 28       | <i>Enterobacter hormaechei</i>     | CEMTC 2802                  | insect                  |
| 29       | <i>Enterobacter hormaechei</i>     | CEMTC 2803                  | insect                  |
| 30       | <i>Enterobacter hormaeche</i>      | CEMTC 2804                  | insect                  |
| 31       | <i>Enterobacter hormaechei</i>     | CEMTC 2911                  | veterinary              |
| 32       | <i>Enterobacter hormaechei</i>     | CEMTC 3050                  | clinical                |
| 33       | <i>Enterobacter hormaechei</i>     | CEMTC 3751                  | clinical                |
| 34       | <i>Enterobacter hormaechei</i>     | CEMTC 3783                  | clinical                |
| 35       | <i>Enterobacter hormaechei</i>     | CEMTC 3907                  | clinical                |
| 36       | <i>Enterobacter ludwigii</i>       | CEMTC 86                    | clinical                |
| 37       | <i>Enterobacter ludwigii</i>       | CEMTC 87                    | clinical                |
| 38       | <i>Enterobacter ludwigii</i>       | CEMTC 830                   | clinical                |
| 39       | <i>Enterobacter ludwigii</i>       | CEMTC 3805                  | clinical                |
| 40       | <i>Enterobacter xiangfangensis</i> | CEMTC 2521                  | clinical                |
| 41       | <i>Enterobacter xiangfangensis</i> | CEMTC 2584                  | clinical                |
| 42       | <i>Enterobacter xiangfangensis</i> | CEMTC 2928                  | veterinary              |
| 43       | <i>Enterobacter</i> sp.            | CEMTC 2018                  | plant                   |
| 44       | <i>Enterobacter</i> sp.            | CEMTC 2035                  | clinical                |

|    |                              |             |            |
|----|------------------------------|-------------|------------|
| 45 | <i>Escherichia coli</i>      | ATCC 25922  | ATCC       |
| 46 | <i>Escherichia coli</i>      | CEMTC 69    | clinical   |
| 47 | <i>Escherichia coli</i>      | CEMTC 76    | clinical   |
| 48 | <i>Escherichia coli</i>      | CEMTC 77    | clinical   |
| 49 | <i>Escherichia coli</i>      | CEMTC 83    | clinical   |
| 50 | <i>Escherichia coli</i>      | CEMTC 83    | clinical   |
| 52 | <i>Escherichia coli</i>      | CEMTC 837   | clinical   |
| 51 | <i>Escherichia coli</i>      | CEMTC 829   | clinical   |
| 53 | <i>Escherichia coli</i>      | CEMTC 3002  | clinical   |
| 54 | <i>Escherichia coli</i>      | CEMTC 3017  | veterinary |
| 55 | <i>Klebsiella aerogenes</i>  | CEMTC 2420  | clinical   |
| 56 | <i>Klebsiella aerogenes</i>  | CEMTC 2531  | clinical   |
| 57 | <i>Klebsiella aerogenes</i>  | CEMTC 2890  | clinical   |
| 58 | <i>Klebsiella aerogenes</i>  | CEMTC 3530  | clinical   |
| 59 | <i>Klebsiella grimontii</i>  | CEMTC 1801  | clinical   |
| 60 | <i>Klebsiella grimontii</i>  | CEMTC 1838  | clinical   |
| 61 | <i>Klebsiella oxytoca</i>    | ATCC 49131  | ATCC       |
| 62 | <i>Klebsiella pneumoniae</i> | ATCC 13883  | ATCC       |
| 63 | <i>Klebsiella pneumoniae</i> | ATCC 700603 | ATCC       |
| 64 | <i>Klebsiella pneumoniae</i> | CEMTC 270   | clinical   |
| 65 | <i>Klebsiella pneumoniae</i> | CEMTC 356   | clinical   |
| 66 | <i>Klebsiella pneumoniae</i> | CEMTC 1819  | clinical   |
| 67 | <i>Klebsiella pneumoniae</i> | CEMTC 1922  | veterinary |
| 68 | <i>Klebsiella pneumoniae</i> | CEMTC 1967  | clinical   |
| 69 | <i>Klebsiella pneumoniae</i> | CEMTC 2067  | clinical   |
| 70 | <i>Klebsiella pneumoniae</i> | CEMTC 2071  | clinical   |
| 71 | <i>Klebsiella pneumoniae</i> | CEMTC 2274  | veterinary |
| 72 | <i>Klebsiella pneumoniae</i> | CEMTC 2291  | clinical   |
| 73 | <i>Salmonella enterica</i>   | CEMTC 836   | veterinary |
| 74 | <i>Salmonella enterica</i>   | CEMTC 1844  | veterinary |
| 75 | <i>Salmonella enterica</i>   | CEMTC 2842  | veterinary |
| 76 | <i>Shigella dysenteriae</i>  | CEMTC 2398  | clinical   |
| 77 | <i>Pantoea agglomerans</i>   | CEMTC 1637  | plant      |
| 78 | <i>Pantoea agglomerans</i>   | CEMTC 1958  | clinical   |
| 79 | <i>Pantoea agglomerans</i>   | CEMTC 3028  | veterinary |
| 80 | <i>Pantoea agglomerans</i>   | CEMTC 3939  | insect     |

\*CEMTC - Collection of Extremophilic Microorganisms and Type Cultures of the Institute of Chemical Biology and Fundamental Medicine, seven approved species Siberian Branch of Russian Academy of Science
